1 Practice modifies the response to errors  
2 during a novel motor sequence learning  
3 task  
4  
5

6 **Dhanush Rachaveti<sup>1</sup>, Rajiv Ranganathan<sup>2</sup>, and Varadhan SKM<sup>\*</sup>**

7 <sup>1</sup>Chennai, India

8 <sup>\*</sup>Department of Applied Mechanics, Indian Institute of Technology Madras, Chennai, India.

9 <sup>2</sup>Department of Kinesiology, Department of Mechanical Engineering, Michigan State  
10 University, Michigan, USA.

11 Email: <sup>1</sup>rachaveti@gmail.com; <sup>2</sup>rrangana@msu.edu; <sup>\*</sup>skm@iitm.ac.in

12 ORCID: <sup>1</sup>0000-0002-6214-0194; <sup>2</sup>0000-0002-6924-253X; <sup>\*</sup>0000-0002-5746-2340

13

14 **Corresponding Author:**

15 Dr Varadhan SKM  
16 Assistant professor  
17 Department of Applied Mechanics  
18 Indian Institute of Technology, Madras  
19 Chennai - 600036  
20 Tamil Nadu  
21 +91-44-22574071  
22 skm@iitm.ac.in  
23

24

25

26

27

## 28 Abstract

29 The occurrence of an error when performing a motor sequence causes an immediate  
30 reduction in speed on subsequent trials, which is referred to as post-error slowing. However,  
31 understanding how post-error slowing changes with practice has been difficult because it  
32 requires extended practice on a novel sequence task. To address this issue, we examined post-  
33 error slowing in a novel glove-based typing task that participants performed for 15  
34 consecutive days. Speed and accuracy improved from the early to middle stages of practice,  
35 but did not show any further improvements between middle and late stage of practice.  
36 However, when we analyzed the response to errors, we found that participants decreased both  
37 the magnitude and duration of post-error slowing with practice, even after there were no  
38 detectable improvements in overall task performance. These results indicate that learning not  
39 only improves overall task performance but also modifies the ability to respond to errors.

40

41 **Keywords:** speed, accuracy, practice, typing, errors, learning, post-error slowing

42

43

44

45

46

## 47 Introduction

48 Mastering real-world skills such as typing or playing the piano involve a specific type of  
49 motor learning termed sequence learning<sup>1, 2, 3, 4</sup>. From the viewpoint of task performance,  
50 motor sequence learning has been extensively characterized – learning results in overall  
51 improvements in speed and accuracy<sup>5, 6, 7, 8, 9</sup>. The underlying neural changes associated with  
52 such learning have also been well documented both in typical controls and in individuals with  
53 motor disorders<sup>10, 11</sup>.

54 Although these overall improvements in speed and accuracy are well described, the question  
55 of how participants respond to errors on shorter time scales is less understood. As suggested  
56 by Crump and Logan (2013)<sup>12</sup>, errors may serve two distinct roles – (i) a prevention role, in  
57 which participants learn from errors to prevent future errors, and (ii) a correction role in  
58 which participants simply respond in a way to fix the error that was made. A critical  
59 distinction between these two roles is based on how participants respond following an error  
60 on shorter time scales – the prevention role is characterized by ‘post-error slowing’ (i.e. an  
61 increase in movement time following an error)<sup>13, 14, 15, 16, 17, 18</sup>.

62 A critical question is whether this post-error slowing is modified with learning. Logan and  
63 Crump (2013) suggested that practice would result in a decrease of post-error slowing,  
64 possibly because there is not much to learn from an error at higher skill levels. However, to  
65 date, this evidence has mostly been cross-sectional<sup>19, 20, 21, 22, 23, 24, 25, 26</sup>. There are two  
66 limitations of such cross-sectional designs: (i) the ability to make causal inferences about the  
67 role of practice is limited, and (ii) measurements of post-error slowing are confounded with  
68 changes in the level of absolute task performance - i.e. because novices are slower than  
69 experts, comparing the ‘amount’ of slowing can be a challenge because of the differences in  
70 baseline performance.

71 To address these limitations, in the current study, we examined post-error slowing in a  
72 longitudinal design using a novel sequence learning task. Participants practiced a glove-based  
73 typing task with relatively high complexity (over 250 5-letter words) for an extended period  
74 (15 days). This unique experimental design allowed us to (i) examine causal effects of  
75 practice on post-error slowing, and (ii) minimize confounds of task performance by  
76 examining changes in post-error slowing after task performance has reached a relative  
77 ‘plateau’. Based on the prior literature on post-error slowing, we tested the hypothesis that  
78 post-error slowing decreases with practice<sup>21</sup>.

## 79 Methods

### 80 Participants

81 Eight healthy, right-hand dominant participants (6 males & 2 females,  $M \pm SD$ : Age:  $26.8 \pm$   
82  $2.6$  yrs., Height:  $163.5 \pm 6.0$  cm, Weight:  $66.8 \pm 10.5$  kg) volunteered for the study.  
83 Participants had no history of any neuro-motor disorder or trauma to the hand or fingers and  
84 were naïve to the purpose of the experiment. Handedness was determined using Edinburgh  
85 handedness inventory<sup>27</sup> and all participants had a handedness score above 90% (score of 90  
86 and above indicates that participants were right hand dominant). All participants provided  
87 written informed consent before participating in the experiment. The institutional ethics  
88 committee of the Indian Institute of Technology Madras approved all the procedures needed  
89 to conduct this study (Approval number: IEC/2016/02/VSK-12/22).

### 90 Experimental Setup

91 Our experimental system was a glove-based typing device (Figure 1a). This system  
92 consisted of a glove with conductive key patches placed approximately at the centre of  
93 each segment in the index, middle, ring and little fingers (3 segments \* 4 fingers = 12  
94 keys) and one at the distal end of the thumb. Among these 13 keys, the one on the thumb

95 was used as a switch while the 12 on the other fingers were assigned with nine specific  
96 letters, space, backspace and caps lock. These keys were connected to a microcontroller  
97 (Teensy 2.0++) using conductive thread, metallic buttons and cables.

98 To type a particular key, participants had to touch the corresponding key patch on a finger  
99 with the thumb, which then closed the electrical circuit. A customized program in the  
100 microcontroller detected this event, and the program then sent the ASCII code assigned to  
101 that specific key to the computer through a USB port. For example, when the participant  
102 touched the middle phalanx of the index finger, the letter 'S' was typed on the computer  
103 screen, (Figure 1a). Gloves were custom-made to suit the hand dimensions for each  
104 participant. The text from the glove was processed by a customized LabVIEW based  
105 program at 1000 Hz.

#### 106 Task

107 The goal of the participants was to type a set of words as fast and as accurately as possible.  
108 Rather than let participants choose their speed (which might not reflect their actual  
109 maximum speed), we selected a 'game interface' where we could set the typing speed. This  
110 allowed us to probe the maximum speed of the participants more closely. This interface is  
111 described below.

#### 112 Training words

113 Words used in the experiment were 5-letter words picked from a custom dictionary. This  
114 dictionary comprised of 281 words each made up from the nine most frequently used  
115 letters - e, s, o, n, i, t, a, r, h<sup>28</sup>. These letters were mapped to keys on the glove to form a  
116 'key-map'(Figure 1b). For all participants, the same key-map was used on all days and  
117 blocks

118

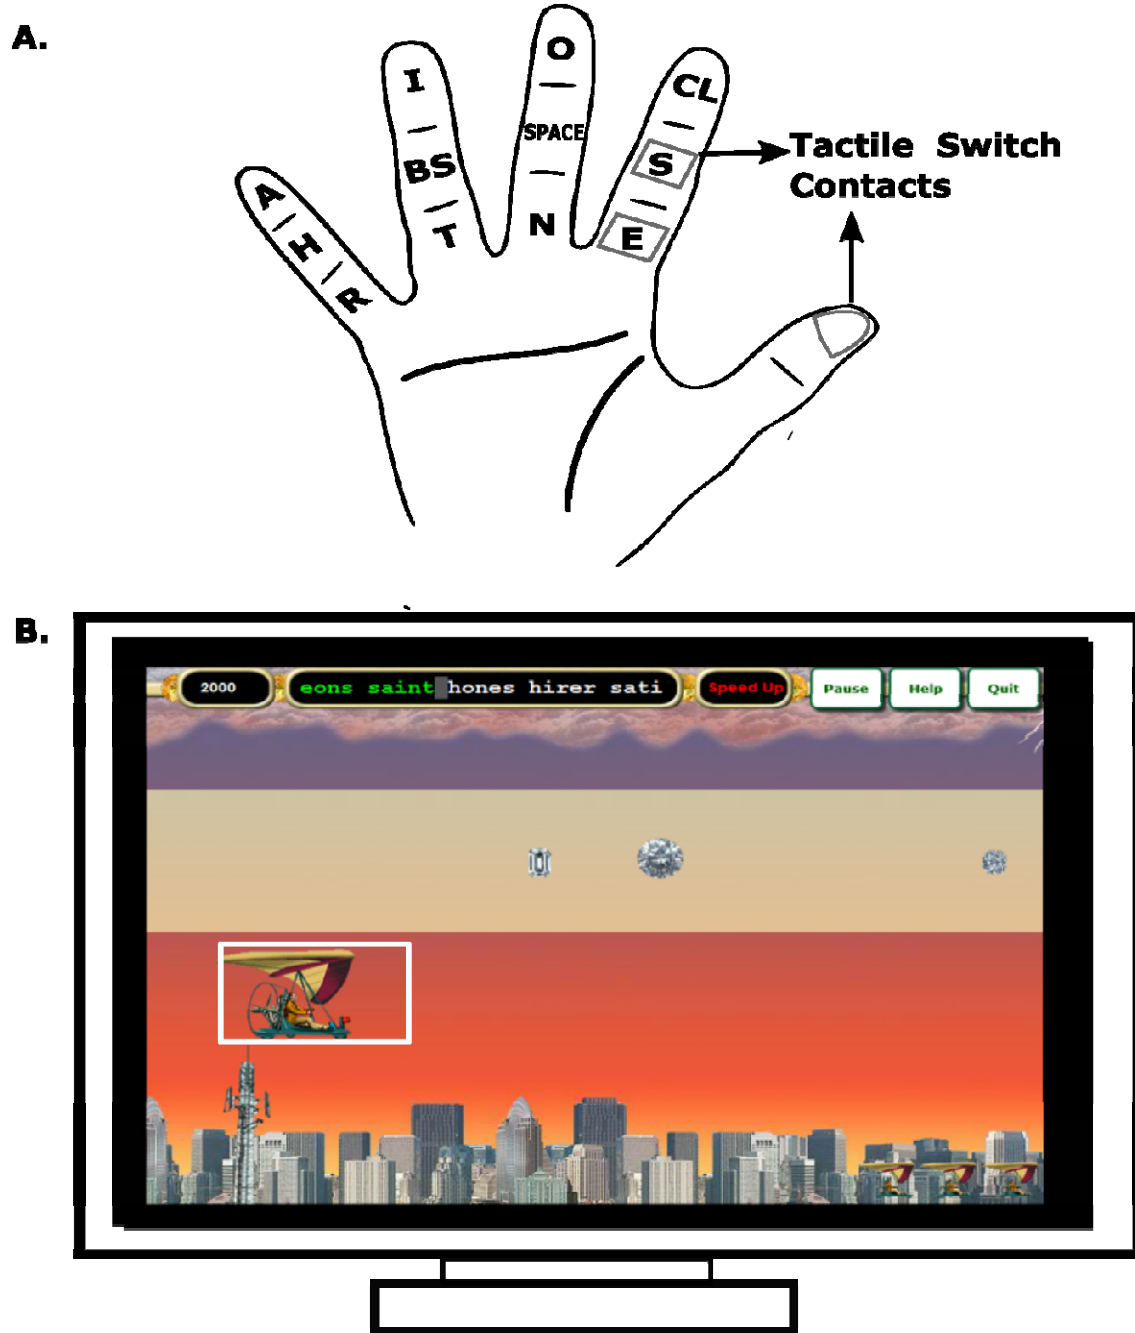

119

**Figure 1: Schematic of the experimental setup. (A) Glove based typing device.** Participants wore gloves (showed with dotted lines) such that the tactile switches on the glove faced towards the participants. Key patches (shown as squares around the alphabets) were sewn on each finger segment on the gloves. SP, CL, BS denotes “SPACE”, “Caps Lock”, “Back Space”. Conductive threads sewn on the glove were used to connect the key patches to a button connector, which was used to interface with the microcontroller. When a key patch was touched with the thumb, a custom-written code in the microcontroller converted the touch into text. This was shown on the computer monitor. **B. Practice interface:** Words were typed in a game environment with words moving from from right to left as participants typed the words. The objective of the game was to type the words as fast and accurately as possible so that the glider (highlighted in white box) moved from left to right towards the destination. There was also a speed and accuracy constraint - the glider lost altitude and eventually crashed if participants did not maintain a particular speed or accuracy. The words to be typed were shown to the participants in the top panel of the game. The correctly completed keys and words were highlighted in green, and the words yet to be typed were shown in white. At the end of each word participants typed “SPACE” to move to the next word. The Caps Lock and Back Space keys were never used in the current experiment.

133 Game Interface

134 The words typed by participants were displayed in a game interface (Diamond glider game in  
135 Typing Instructor® Platinum 21, Individual software, CA, USA) (Figure 1c). The objective  
136 of the game was to type words quickly and accurately to move a glider from the starting  
137 point to destination without crashing. The glider moved towards the destination as the  
138 participants typed. Words to be typed appeared on the right and moved left on the screen  
139 as the participant typed them. If a correct letter was typed, that letter was highlighted in  
140 green, and the cursor moved to the next letter. If a wrong letter was typed, that letter was  
141 highlighted in red, and the cursor stayed on the same letter, until the correct letter was  
142 typed. An audible beep tone was played when an error occurred. In addition to the words,  
143 participants had to type the SPACE key in between words (For more details see our data  
144 paper<sup>28</sup>).

145 Protocol

146 Participants practiced the experimental task for 15 consecutive days (including weekends)  
147 and data were collected on all days of practice. Each day/session was divided into 12 blocks  
148 of 2 mins each with 30 seconds interval between blocks. Words could repeat within a block  
149 but not between blocks, and words on a given block remained same across all days (i.e.. the  
150 m<sup>th</sup> Block was composed of the same set of words on all days but the order of word  
151 presentation may change between days; the n<sup>th</sup> block always had a set of words different from  
152 the m<sup>th</sup> block, when  $m \neq n$ ). All blocks had 23 words with the exception of the 12<sup>th</sup> block  
153 which had 28 words.

## 154 Data Analysis

### 155 Movement Time

156 Movement time (MT) was defined as the time taken to reach/press a particular letter after the  
157 release of the previously typed letter, which is computed as the difference between keypress  
158 time of the specific letter and the key release time of the previously typed letter. This value  
159 was averaged across all blocks in a given day of practice.

### 160 Errors

161 Errors were defined as the ratio of the number of letters mistyped to the total letters typed in a  
162 block. This value was averaged across all blocks in a given day of practice.

### 163 Post-error slowing

164 Post-error slowing was assessed using two measures: (i) the magnitude, which refers to the  
165 increase in MT after an error. and (ii) the duration, which refers to the time taken (measured  
166 in keystrokes) for the MT to recover to pre-error levels. To separate “pre-error” vs. “post-  
167 error” segments, we first traversed to every error in a block and separated the MT values into  
168 segments before (pre) and after (post) the onset of an error. For each error, we then  
169 determined a ‘recovery point’ by examining the point where the post-error MT was equal or  
170 less than the pre-error MT.

### 171 Magnitude

172 The magnitude of post-error slowing was computed as the absolute difference between the  
173 average of MT values before and after an error. For the ‘pre-error’ segments, the average of  
174 MT values prior to an error was considered until the recovery point of the previous error (or  
175 to the first keystroke if this was the first error). For the ‘post-error’ segments, the average of  
176 MT values after an error was taken until the recovery point of the current error (or to the last  
177 keystroke if this was the last error). Because MT also decreases with practice, we computed



178 the magnitude of post-error slowing as a ‘relative change’ by normalizing the change in MT  
179 (the absolute difference between mean values of MT before and after an error) to the mean  
180 values of MT just before an error. Thus, if the magnitude of the post-error slowing reduces, it  
181 indicates a smaller decrease in MT after an error.

## 182 Duration

183 The duration of post-error slowing was computed as the number of keystrokes it took for the  
184 MT value to become less than or equal to pre-error MT values. Similar to the magnitude  
185 computation, the duration was defined based on the recovery point. Thus, a reduction in the  
186 duration of post-error slowing indicates that MT took less time to recover to pre-error values.

## 187 Statistical Analysis

188 Data from the outcome variables were organized into three stages – the Early-stage consisted  
189 of Days 1, 2, 3; the Middle stage included Days 7, 8, 9, and the Late-stage consisted of Days  
190 13, 14, 15. One-way repeated-measures ANOVA with three levels was used for statistical  
191 analyses on all the outcome variables with Practice stage as a factor (3 levels – Early, Middle,  
192 Late) and participant as a random factor. Corrections for sphericity were performed using the  
193 Huynh-Feldt criterion wherever appropriate. Significant effects were further analyzed using  
194 Tukey’s posthoc test. Effect sizes are reported using partial eta-squared values ( $\eta_p^2$ ).

## 195 Results

196 Overall, participants showed improvements in task performance as they practiced the typing  
197 task. This performance improvement was seen as an overall decrease in the movement times  
198 (Figure 2a) and errors (Figure 2b).

199 Movement Time

200 MT reduced with practice (Figure 2c). This observation was supported by one-way repeated  
201 measures ANOVA that showed a reduction in MT due to practice stage ( $F_{(1.82, 12.74)} = 179.30$ ,  
202  $p < 0.001$ ,  $\eta_p^2 = 0.96$ ). Post-hoc comparisons showed that MT reduced between early and  
203 middle stages (mean MT: Early- 724 ms, Middle- 404 ms and Late-332 ms.  $p < 0.001$ ), but  
204 there was no significant difference between middle and late practice stages ( $p = 0.16$ ).

205

206 Errors

207 Errors reduced with practice (Figure 2d). This observation was supported by a one-way  
208 repeated measures ANOVA that showed a reduction of errors due practice stage ( $F_{(1.03, 7.21)} =$   
209  $25.47$ ,  $p < 0.001$ ,  $\eta_p^2 = 0.83$ ). Similar to the movement time results, post-hoc comparisons  
210 showed that errors decreased between early and middle stages (mean errors: Early- 3.9%,  
211 Middle- 0.9%, Late- 0.6%;  $p < 0.001$ ), but there was no significant difference between  
212 middle and late practice stages ( $p = 0.55$ ).

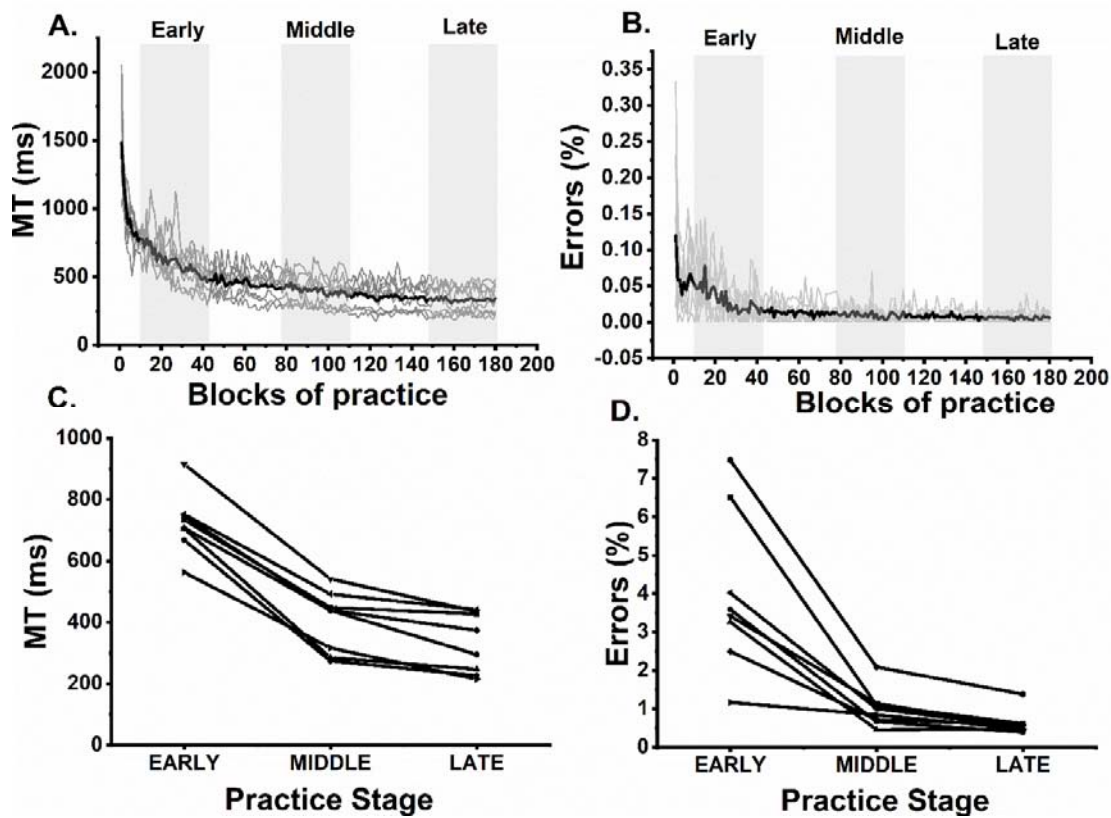

213

**Figure 2: Changes in task performance with practice.** (A) Movement time and (B) Error percent are shown as a function of practice for all the participants. The black line indicates the mean across the participants while the grey lines indicate data from individual participants. Each day of practice consisted of 12 blocks. The first three days (36 blocks) were considered as the early stage of practice, days 7 to 9 were considered as a middle stage of practice, while the last three days were considered as a late stage of practice (C) MT as a function of practice stage for individual participants. Movement time (MT) reduced significantly from the early to the middle stage, but there was no significant difference between the middle and late stages of Practice (D) Error percent as a function of practice stage for individual participants. Error percent reduced significantly from early to late stages of practice. Each line represents a single participant. There was a significant improvement from early to the middle, but there was no significant difference between middle and late stages of practice.

214

215 Post-error slowing

216 Post-error slowing (i.e. increase in MT following an error) for a single participant can be seen

217 both in terms of the absolute movement time (Figure 3a) and normalized movement time

218 (Figure 3b). The post-error slowing showed changes both in magnitude and duration with

219 practice.

220

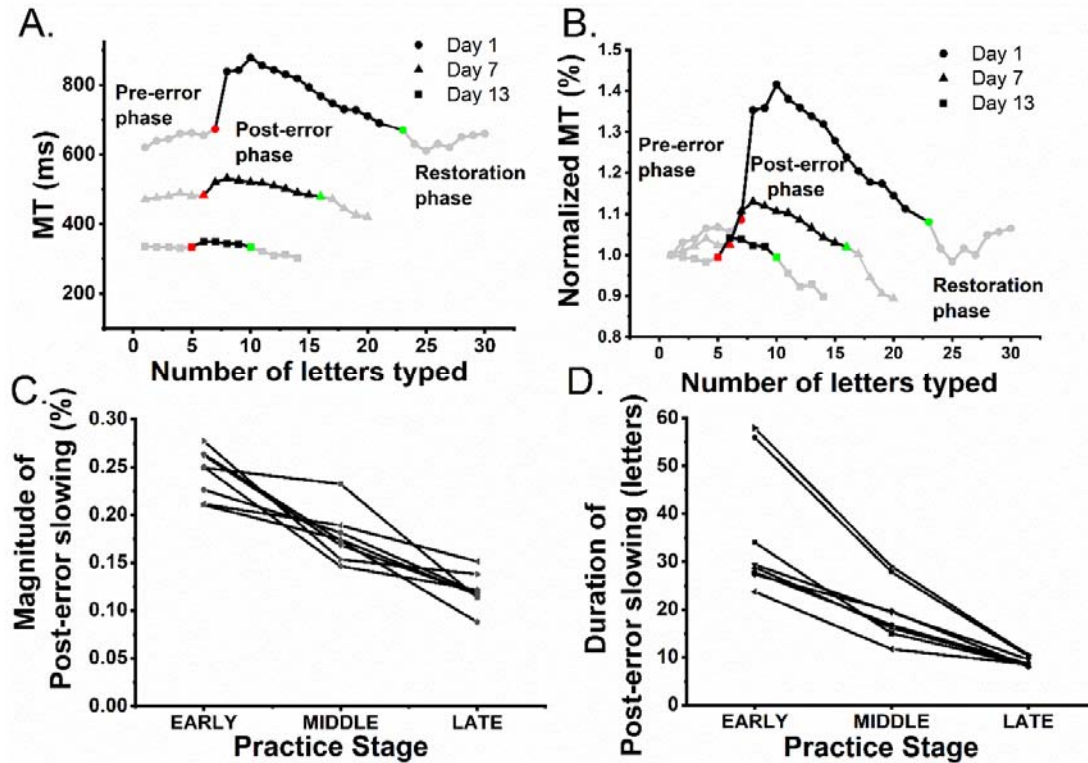

221

222 **Figure 3: Changes in post-error slowing with practice.** (A) Raw data of movement time and occurrence of an error from a  
223 single participant: Raw MT data plotted on three days (day 1, 7 and 13) and split into three phases (pre-error, post-error, and  
224 restoration). The onset of an error is indicated as a solid red symbol, and the onset of the recovery (i.e.) is indicated by the  
225 green symbol. (B) Normalized raw data of movement time and occurrence of an error from a single participant. The same  
226 data in panel A is represented as a 'normalized' value by dividing each value by the pre-error value (first value in the  
227 absolute MT graph (section a)) of MT. (C) Change in the magnitude of post-error slowing across all subjects as a function of  
228 practice shows the change in the magnitude of post-error slowing for individual participants. There was a significant  
229 reduction ( $p < 0.001$ ) in the magnitude of post-error slowing, between early, middle and late stages of practice. (D) Change  
230 in duration of post-error slowing for individual participants. Once again, there was a significant difference ( $p < 0.001$ )  
231 between early, middle and late stages of practice. Each line in panels C and D represents an individual participant.  
232

233 Magnitude

234 The magnitude of post-error slowing decreased with practice (Figure 3c). This observation  
235 was supported by a one-way repeated measures ANOVA that showed a reduction in  
236 magnitude of post-error slowing due to practice stage ( $F_{(2.4, 16.8)} = 45.088$ ,  $p < 0.001$ ,  
237  $\eta_p^2 = 0.86$ ). Post hoc comparisons showed that early practice stage was different from middle  
238 practice stage (mean magnitude: Early- 0.24%, Middle-0.17%, Late- 0.12%;  $p < 0.001$ ).  
239 However, there was also a significant reduction in magnitude between middle and late  
240 practice stages ( $p < 0.001$ ) even though MTs between the middle and late practice were not  
241 significantly different.

242

243 Duration

244 The duration of post-error slowing also reduced with practice, as shown in Figure 3d. This  
245 observation was supported by one-way repeated measures ANOVA that showed a reduction  
246 in duration due to practice stage ( $F_{(1.1, 7.7)} = 36.27, p < 0.001, \eta_p^2 = 0.83$ ). Post hoc  
247 comparisons showed that early practice stage was different from both middle and late  
248 practice stages (mean duration: E- 36 letters, M-19 letters, L- 9 letters;  $p < 0.001$ ). However,  
249 once again, there was a significant reduction in duration between middle and late practice  
250 stages ( $p = 0.002$ ) even though MTs between the middle and late practice were not  
251 significantly different.

252

## 253 Discussion

254 The motivation for the present study was to understand the phenomenon of post-error  
255 slowing as a function of practice. We used three key features in our experiment – (a) a  
256 longitudinal design to examine the causal effects of practice, (b) a novel glove-based motor  
257 sequence learning task with high task complexity to examine the early phase of motor  
258 learning, and (c) an extended practice period until task performance reached a relative plateau  
259 to minimize the confounds of comparing post-error slowing at different levels of task  
260 performance. Based on prior work, we hypothesized that changes in the post-error slowing  
261 would decrease with practice, and our results were consistent with this hypothesis.

262 First, we found expected effects of practice on overall speed and accuracy. Errors reduced  
263 with practice in the early to middle (or late) stage of practice. However, there were relatively  
264 small differences between the middle and late stages of practice suggesting that errors  
265 plateaued approximately around the middle stage of practice. Similarly, MT reduced from

266 early to the late stage of practice and plateaued between middle and late stage of practice.  
267 These results on speed and accuracy in performing novel motor sequence learning tasks are  
268 consistent with the prior work<sup>5, 6, 7, 9</sup>.

269 Second, we found effects of practice on post-error slowing, even after task performance had  
270 reached a relative plateau. During the early stage of practice, both magnitude and duration of  
271 post-error slowing was high, indicating that participants slowed down more often to avoid  
272 future errors. However, during later stages of practice, there was a reduction in both the  
273 magnitude and duration of post-error slowing. This reduction in the magnitude and duration  
274 of post-error slowing indicates that the participants reacted to errors with a smaller increase in  
275 speed and regained speed quickly after errors with no major changes in error rates<sup>29, 12, 30, 14,</sup>  
276 <sup>15</sup>. This reduction in post-error slowing was seen even after MT and errors relatively  
277 plateaued during the late stage of practice. These results confirm that the post-error slowing  
278 indeed decreased with practice, and was not confounded by underlying changes in task  
279 performance.

280 There are two potential theoretical explanations for why post-error slowing decreases with  
281 practice – i.e. why participants become less sensitive to errors. First, as suggested by Logan  
282 and Crump (2009)<sup>21</sup>, the decrease in post-error slowing may be a consequence of the fact that  
283 there is ‘less to learn’ from an error as participants become more skilled. Responding to  
284 errors can be viewed as a ‘credit assignment’ problem<sup>31, 32</sup> where the nervous system has to  
285 estimate the source of these errors. Since errors become less frequent with learning,  
286 participants in the late stage of learning may be more likely to attribute an error to the ‘world’  
287 rather than their own ‘bodies’, which would explain why the sudden occurrence of an error  
288 does not alter performance dramatically on future trials. This explanation is consistent with  
289 work in other domains such as dart throwing, where the response to an error on the next trial  
290 is diminished in experts relative to novices<sup>33, 25</sup>.

291 A second explanation for the reduction in post-error slowing is that continued reliance on  
292 ‘error prevention’ could disrupt automaticity of performance. Motor learning has been  
293 characterized by a transition from conscious, deliberate performance in the early stages of  
294 practice to more automatic performance in the later stages<sup>34</sup>. This transition has been  
295 supported in sequence learning by several features such as chunking<sup>35, 36</sup> and the ability to  
296 perform dual tasks<sup>37, 38, 39</sup>. A smaller response to errors could be reflective of the fact that  
297 participants tend to maintain automatic performance and do not switch to a conscious mode  
298 of control. This could be a beneficial strategy because there is evidence that switching back to a  
299 conscious control mode could be detrimental to overall task performance<sup>19</sup>.

300 In conclusion, we showed that motor sequence learning not only involves changes in overall  
301 speed and accuracy, but also in how participants respond to errors, both in terms of the  
302 magnitude and duration. Our results suggest that theories of sequence learning not only need  
303 to describe overall improvements in task performance, but also need to account for these  
304 shorter time scale changes in response to errors, and their change with learning.  
305 Understanding these responses to errors may provide greater insight into skilled performance  
306 and could also be exploited to tailor practice schedules based on skill level.

## 307 References

308

- 309 1. Clegg, B. A., DiGirolamo, G. J. & Keele, S. W. Sequence learning. *Trends in Cognitive*  
310 *Sciences* **2**, 275–281 (1998).
- 311 2. Palmer, C. & Van de Sande, C. Units of knowledge in music performance. *Journal of*  
312 *Experimental Psychology: Learning, Memory, and Cognition* **19**, 457–470 (1993).
- 313 3. Palmer, C. & van de Sande, C. Range of planning in music performance. *J Exp Psychol*  
314 *Hum Percept Perform* **21**, 947–962 (1995).

- 315 4. Rumelhart, D. E. & Norman, D. A. Simulating a Skilled Typist: A Study of Skilled  
316 Cognitive-Motor Performance. *Cognitive Science* **6**, 1–36 (1982).
- 317 5. Friedman, J. & Korman, M. Kinematic Strategies Underlying Improvement in the  
318 Acquisition of a Sequential Finger Task with Self-Generated vs. Cued Repetition  
319 Training. *PLoS ONE* **7**, e52063 (2012).
- 320 6. Karni, A. *et al.* Functional MRI evidence for adult motor cortex plasticity during motor  
321 skill learning. *Nature* **377**, 155–158 (1995).
- 322 7. Karni, A. *et al.* The acquisition of skilled motor performance: fast and slow experience-  
323 driven changes in primary motor cortex. *Proceedings of the National Academy of*  
324 *Sciences* **95**, 861–868 (1998).
- 325 8. Karni, A. The acquisition of perceptual and motor skills: a memory system in the adult  
326 human cortex. *Cognitive Brain Research* **5**, 39–48 (1996).
- 327 9. Rozanov, S., Keren, O. & Karni, A. The specificity of memory for a highly trained finger  
328 movement sequence: Change the ending, change all. *Brain Research* **1331**, 80–87 (2010).
- 329 10. Doyon, J. *et al.* Experience-dependent changes in cerebellar contributions to motor  
330 sequence learning. *PNAS* **99**, 1017–1022 (2002).
- 331 11. Stickgold, R. & Walker, M. P. *The Neuroscience of Sleep*. (Academic Press, 2010).
- 332 12. Crump, M. J. C. & Logan, G. D. Prevention and correction in post-error performance: An  
333 ounce of prevention, a pound of cure. *Journal of Experimental Psychology: General* **142**,  
334 692–709 (2013).
- 335 13. Laming, D. R. J. *Information theory of choice-reaction times*. (Academic Press, 1968).
- 336 14. Rabbitt, P. M. Errors and error correction in choice-response tasks. *Journal of*  
337 *Experimental Psychology* **71**, 264–272 (1966).
- 338 15. Rabbitt, P. M. A. Error Correction Time without External Error Signals. *Nature* **212**,  
339 438–438 (1966).



- 340 16. Rabbitt, P. Psychological refractory delay and response-stimulus interval duration in  
341 serial, choice-response tasks. *Acta Psychologica* **30**, 195–219 (1969).
- 342 17. Rabbitt, P. M. A. & Vyas, S. M. An elementary preliminary taxonomy for some errors in  
343 laboratory choice RT tasks. *Acta Psychologica* **33**, 56–76 (1970).
- 344 18. Yamaguchi, M., Crump, M. J. C. & Logan, G. D. Speed-accuracy trade-off in skilled  
345 typewriting: decomposing the contributions of hierarchical control loops. *J Exp Psychol*  
346 *Hum Percept Perform* **39**, 678–699 (2013).
- 347 19. Beilock, S. L., Carr, T. H., MacMahon, C. & Starkes, J. L. When paying attention  
348 becomes counterproductive: impact of divided versus skill-focused attention on novice  
349 and experienced performance of sensorimotor skills. *J Exp Psychol Appl* **8**, 6–16 (2002).
- 350 20. Logan, G. D. & Zbrodoff, N. J. Stroop-type interference: Congruity effects in color  
351 naming with typewritten responses. *Journal of Experimental Psychology: Human*  
352 *Perception and Performance* **24**, 978–992 (1998).
- 353 21. Logan, G. D. & Crump, M. J. C. The Left Hand Doesn't Know What the Right Hand Is  
354 Doing: The Disruptive Effects of Attention to the Hands in Skilled Typewriting. *Psychol*  
355 *Sci* **20**, 1296–1300 (2009).
- 356 22. Logan, G. D. & Crump, M. J. C. Cognitive Illusions of Authorship Reveal Hierarchical  
357 Error Detection in Skilled Typists. *Science* **330**, 683–686 (2010).
- 358 23. Snyder, K. M. & Logan, G. D. The problem of serial order in skilled typing. *Journal of*  
359 *Experimental Psychology: Human Perception and Performance* **40**, 1697–1717 (2014).
- 360 24. Snyder, K. M., Logan, G. D. & Yamaguchi, M. Watch what you type: The role of visual  
361 feedback from the screen and hands in skilled typewriting. *Atten Percept Psychophys* **77**,  
362 282–292 (2015).
- 363 25. van Beers, R. J., van der Meer, Y. & Veerman, R. M. What Autocorrelation Tells Us  
364 about Motor Variability: Insights from Dart Throwing. *PLoS One* **8**, (2013).

- 365 26. Yamaguchi, M. & Logan, G. D. Pushing typists back on the learning curve: Contributions  
366 of multiple linguistic units in the acquisition of typing skill. *Journal of Experimental*  
367 *Psychology: Learning, Memory, and Cognition* **40**, 1713–1732 (2014).
- 368 27. Oldfield, R. C. The assessment and analysis of handedness: The Edinburgh inventory.  
369 *Neuropsychologia* **9**, 97–113 (1971).
- 370 28. Rachaveti, D. & Skm, V. Motor sequence learning data collected continuously for fifteen  
371 days of practice using a novel glove-based typing device. *Data in Brief* **29**, 105234  
372 (2020).
- 373 29. Fiehler, K., Ullsperger, M. & Cramon, D. Y. V. Electrophysiological correlates of error  
374 correction. *Psychophysiology* **42**, 72–82 (2005).
- 375 30. Logan, G. D. & Crump, M. J. C. Chapter one - Hierarchical Control of Cognitive  
376 Processes: The Case for Skilled Typewriting. in *Psychology of Learning and Motivation*  
377 (ed. Ross, B. H.) vol. 54 1–27 (Academic Press, 2011).
- 378 31. Berniker, M. & Kording, K. Estimating the sources of motor errors for adaptation and  
379 generalization. *Nature Neuroscience* **11**, 1454–1461 (2008).
- 380 32. Berniker, M. & Kording, K. P. Estimating the Relevance of World Disturbances to  
381 Explain Savings, Interference and Long-Term Motor Adaptation Effects. *PLOS*  
382 *Computational Biology* **7**, e1002210 (2011).
- 383 33. van Beers, R. J. Motor learning is optimally tuned to the properties of motor noise.  
384 *Neuron* **63**, 406–417 (2009).
- 385 34. Fitts, P. M. & Posner, M. I. *Human performance*. (Brooks/Cole, 1967).
- 386 35. Acuna, D. E. *et al.* Multifaceted aspects of chunking enable robust algorithms. *J.*  
387 *Neurophysiol.* **112**, 1849–1856 (2014).
- 388 36. Newell, A. & Rosenbloom, P. S. The Soar Papers (Vol. 1). in (eds. Rosenbloom, P. S.,  
389 Laird, J. E. & Newell, A.) 81–135 (MIT Press, 1993).

390 37. Logan, G. D. Toward an instance theory of automatization. in (1988). doi:10.1037/0033-  
391 295X.95.4.492.

392 38. Logan, G. D., Miller, A. E. & Strayer, D. L. Electrophysiological Evidence for Parallel  
393 Response Selection in Skilled Typists. *Psychol Sci* **22**, 54–56 (2011).

394 39. Nissen, M. J. & Bullemer, P. Attentional requirements of learning: Evidence from  
395 performance measures. *Cognitive Psychology* **19**, 1–32 (1987).

#### 396 **Acknowledgements**

397 The Department of Science & Technology, Government of India, supported this work, vide  
398 Reference Nos **SR/CSRI/97/2014 & DST/CSRI/2017/87** under Cognitive Science Research  
399 Initiative (CSRI) (awarded to Varadhan SKM).

#### 400 **Competing Interests**

401 The authors declare that they have no known competing financial interests or personal  
402 relationships that could have appeared to influence the work reported in this paper.

#### 403 **Author Contribution**

##### 404 **The authors have contributed as mentioned in the below section**

- 405 i. Conception or design of the work – Dhanush Rachaveti, Varadhan SKM
- 406 ii. Data collection- Dhanush Rachaveti, Varadhan SKM
- 407 iii. Data analysis and interpretation- Dhanush Rachaveti, Rajiv Ranganathan, Varadhan  
408 SKM
- 409 iv. Drafting the article- Dhanush Rachaveti, Rajiv Ranganathan, Varadhan SKM
- 410 v. Critical revision of the article- Dhanush Rachaveti, Rajiv Ranganathan, Varadhan  
411 SKM
- 412 vi. Final approval of the version to be published- Dhanush Rachaveti, Rajiv  
413 Ranganathan, Varadhan SKM

414
